# Supplementary material for: Novel adamantyl clubbed iminothiazolidinones as promising elastase inhibitors: design, synthesis, molecular docking, ADMET and DFT studies
Source: Royal Society of Chemistry journal article supplement (doi:10.1039/d1ra09318e), 2022-01-01
Supplement: d1ra09318e1.pdf [file d1ra09318e1.pdf]

## Novel Adamantyl clubbed Iminothiozolidinones as promising Elastase Inhibitors: Design, Synthesis, Molecular Docking, ADMET and DFT Studies

Atteeque Ahmed<sup>a</sup>, Aamer Saeed<sup>a\*</sup>, Syeda Abida Ejaz<sup>b\*</sup>, Mubashir Aziz<sup>b</sup>, Muhammad Zaffar Hashmi<sup>c</sup>, Pervaiz Ali Channar<sup>a</sup>, Qamar Abbas<sup>d</sup>, Hussain Raza<sup>e</sup>, Zahid Shafiq<sup>f</sup>, Hesham R El-

Seedi<sup>g,h,i</sup>

<sup>a</sup> Department of Chemistry, Quaid-I-Azam University, Islamabad 45320, Pakistan.

<sup>b</sup> Department of Pharmaceutical Chemistry, faculty of Pharmacy, The Islamia University of Bahawalpur, Bahawalpur 63100, Pakistan

<sup>c</sup> Department of Chemistry, COMSATS University, Islamabad Pakistan.

<sup>d</sup> Department of Biology, College of Science, University of Bahrain, Sakhir, Kingdom of Bahrain

<sup>e</sup> Department of Biological Sciences, College of Natural Sciences, Kongju National University, 56 Gongjudehak-Ro, Gongju, Chungnam 314-701, Republic of Korea

<sup>f</sup> Department of Chemistry, Bahauddin Zakariya University Bosan Road, Multan, Pakistan

<sup>g</sup> School of Food and Biological Engineering, Jiangsu University, Zhenjiang 212013, China -

<sup>h</sup> International Joint Research Laboratory of Intelligent Agriculture and Agri-Products Processing, Jiangsu Education Department, Jiangsu University, Zhenjiang, China

<sup>i</sup> Department of Chemistry, Faculty of Science, Menoufia University, Shebin El-Kom 32512, Egypt

## *Supporting Information*

### **Contents**

#### **THE STRUCTURES OF THE FINAL COMPOUNDS**

#### **GRAPHICAL ABSTRACT OF PERFORM REACTIONS**

#### **SYNTHETIC PATHWAYS**

Synthetic pathway to N-(((1s,3s)-adamantane-1-yl)carbamoithioyl)benzamide (4)

Synthetic pathway to ethyl (Z)-2-((Z)-3-((3s,5s,7s)-adamantan-1-yl)-2-(benzoylimino)-4-oxothiazolidin-5-ylidene)acetate (5)

<sup>1</sup>H-NMR of ethyl (Z)-2-((Z)-3-((3s,5s,7s)-adamantan-1-yl)-2-((2-methylbenzoyl)imino)-4-oxothiazolidin-5-ylidene)acetate (ASE-1)

<sup>13</sup>C-NMR of Ethyl (Z)-2-((Z)-3-((3s,5s,7s)-adamantan-1-yl)-2-((2-methylbenzoyl)imino)-4-oxothiazolidin-5-ylidene)acetate (ASE1)

FTIR of ethyl (Z)-2-((Z)-3-((3s,5s,7s)-adamantan-1-yl)-2-((2-methylbenzoyl)imino)-4-oxothiazolidin-5-ylidene)acetate (ASE-1)

FTIR of ethyl (Z)-2-((Z)-3-((3s,5s,7s)-adamantan-1-yl)-2-((3-methylbenzoyl)imino)-4-oxothiazolidin-5-ylidene)acetate (ASE-2)

<sup>1</sup>H-NMR of ethyl (Z)-2-((Z)-3-((3s,5s,7s)-adamantan-1-yl)-2-((3-methoxybenzoyl)imino)-4-oxothiazolidin-5-ylidene)acetate (ASE-3)

<sup>13</sup>C-NMR of ethyl (Z)-2-((Z)-3-((3s,5s,7s)-adamantan-1-yl)-2-((3-methoxybenzoyl)imino)-4-oxothiazolidin-5-ylidene)acetate (ASE-3)

FTIR of ethyl (Z)-2-((Z)-3-((3s,5s,7s)-adamantan-1-yl)-2-((3-methoxybenzoyl)imino)-4-oxothiazolidin-5-ylidene)acetate (ASE-3)

<sup>1</sup>H-NMR of ethyl (Z)-2-((Z)-3-((3s,5s,7s)-adamantan-1-yl)-2-((4-bromobenzoyl)imino)-4-oxothiazolidin-5-ylidene)acetate (ASE-5)

<sup>13</sup>C-NMR of ethyl (Z)-2-((Z)-3-((3s,5s,7s)-adamantan-1-yl)-2-((4-bromobenzoyl)imino)-4-oxothiazolidin-5-ylidene)acetate (ASE-5)

FTIR of ethyl (Z)-2-((Z)-3-((3s,5s,7s)-adamantan-1-yl)-2-((4-bromobenzoyl)imino)-4-oxothiazolidin-5-ylidene)acetate (ASE-5)

<sup>1</sup>H-NMR of ethyl (Z)-2-((Z)-3-((3s,5s,7s)-adamantan-1-yl)-2-((3-chlorobenzoyl)imino)-4-oxothiazolidin-5-ylidene)acetate (ASE-7)

<sup>13</sup>C-NMR of ethyl (Z)-2-((Z)-3-((3s,5s,7s)-adamantan-1-yl)-2-((3-chlorobenzoyl)imino)-4-oxothiazolidin-5-ylidene)acetate (ASE-7)

FTIR of ethyl (Z)-2-((Z)-3-((3s,5s,7s)-adamantan-1-yl)-2-((3-chlorobenzoyl)imino)-4-oxothiazolidin-5-ylidene)acetate (ASE-7)

<sup>1</sup>H-NMR of ethyl (Z)-2-((Z)-3-((3s,5s,7s)-adamantan-1-yl)-2-((4-fluorobenzoyl)imino)-4-oxothiazolidin-5-ylidene)acetate (ASE-8)

<sup>13</sup>C-NMR of ethyl (Z)-2-((Z)-3-((3s,5s,7s)-adamantan-1-yl)-2-((4-fluorobenzoyl)imino)-4-oxothiazolidin-5-ylidene)acetate (ASE-8)

FTIR of ethyl (Z)-2-((Z)-3-((3s,5s,7s)-adamantan-1-yl)-2-((4-fluorobenzoyl)imino)-4-oxothiazolidin-5-ylidene)acetate (ASE-8)

<sup>1</sup>H-NMR of ethyl (Z)-2-((Z)-3-((3s,5s,7s)-adamantan-1-yl)-2-(benzoylimino)-4-oxothiazolidin-5-ylidene)acetate (ASE-9)

<sup>13</sup>C-NMR of ethyl (Z)-2-((Z)-3-((3s,5s,7s)-adamantan-1-yl)-2-(benzoylimino)-4-oxothiazolidin-5-ylidene)acetate (ASE-9)

FTIR of ethyl (Z)-2-((Z)-3-((3s,5s,7s)-adamantan-1-yl)-2-(benzoylimino)-4-oxothiazolidin-5-ylidene)acetate (ASE-9)

<sup>1</sup>H-NMR of ethyl (Z)-2-((Z)-3-((3s,5s,7s)-adamantan-1-yl)-2-((4-chlorobenzoyl)imino)-4-oxothiazolidin-5-ylidene)acetate (ASE-10)

<sup>13</sup>C-NMR of ethyl (Z)-2-((Z)-3-((3s,5s,7s)-adamantan-1-yl)-2-((4-chlorobenzoyl)imino)-4-oxothiazolidin-5-ylidene)acetate (ASE-10)

FTIR of ethyl (Z)-2-((Z)-3-((3s,5s,7s)-adamantan-1-yl)-2-((4-chlorobenzoyl)imino)-4-oxothiazolidin-5-ylidene)acetate (ASE-10)

<sup>1</sup>H-NMR of ethyl (Z)-2-((Z)-3-((3s,5s,7s)-adamantan-1-yl)-2-((2-chlorobenzoyl)imino)-4-oxothiazolidin-5-ylidene)acetate (ASE-11)

<sup>13</sup>C-NMR of ethyl (Z)-2-((Z)-3-((3s,5s,7s)-adamantan-1-yl)-2-((2-chlorobenzoyl)imino)-4-oxothiazolidin-5-ylidene)acetate (ASE-11)

FTIR of ethyl (Z)-2-((Z)-3-((3s,5s,7s)-adamantan-1-yl)-2-((2-chlorobenzoyl)imino)-4-oxothiazolidin-5-ylidene)acetate (ASE-11)

<sup>1</sup>H-NMR of ethyl (Z)-2-((Z)-3-((3s,5s,7s)-adamantan-1-yl)-2-((4-methoxybenzoyl)imino)-4-oxothiazolidin-5-ylidene)acetate (ASE-12)

<sup>13</sup>C-NMR of ethyl (Z)-2-((Z)-3-((3s,5s,7s)-adamantan-1-yl)-2-((4-methoxybenzoyl)imino)-4-oxothiazolidin-5-ylidene)acetate (ASE-12)

FTIR of ethyl (Z)-2-((Z)-3-((3s,5s,7s)-adamantan-1-yl)-2-((4-methoxybenzoyl)imino)-4-oxothiazolidin-5-ylidene)acetate (ASE-12)

REFERENCES

## THE STRUCTURES OF THE FINAL COMPOUNDS

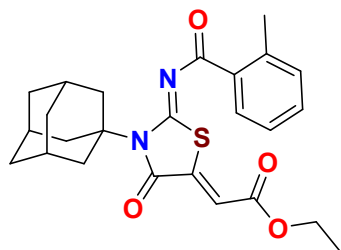

**ASE1**

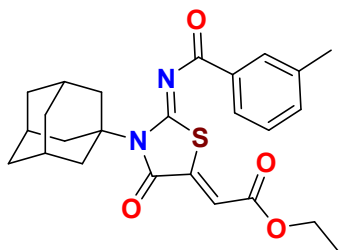

**ASE2**

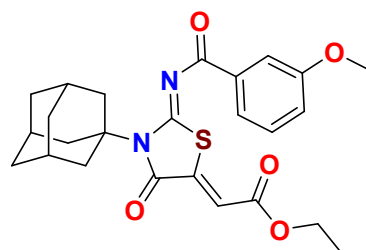

**ASE3**

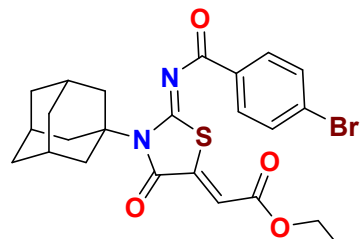

**ASE5**

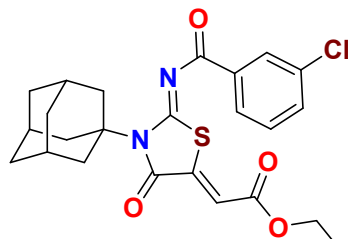

**ASE7**

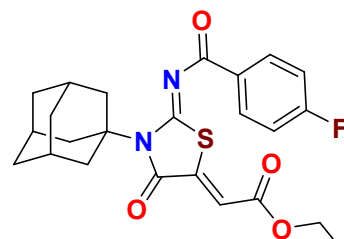

**ASE8**

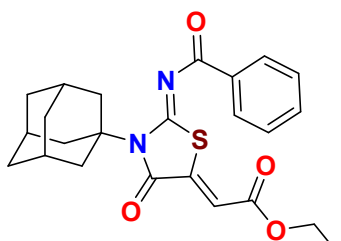

**ASE9**

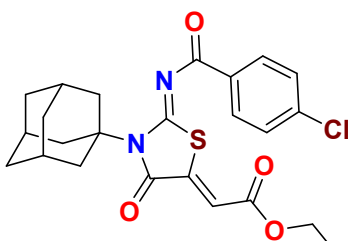

**ASE10**

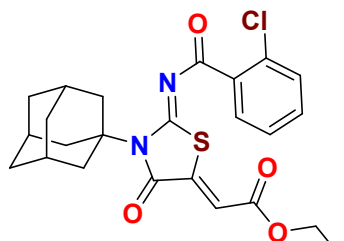

**ASE11**

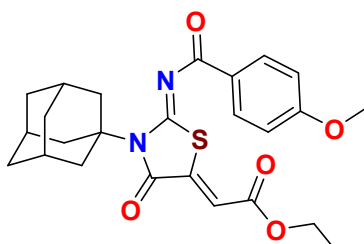

**ASE12**

## SYNTHETIC PATHWAYS

### Synthetic pathway to N-(((1s,3s)-adamantane-1-yl)carbamothioyl)benzamide

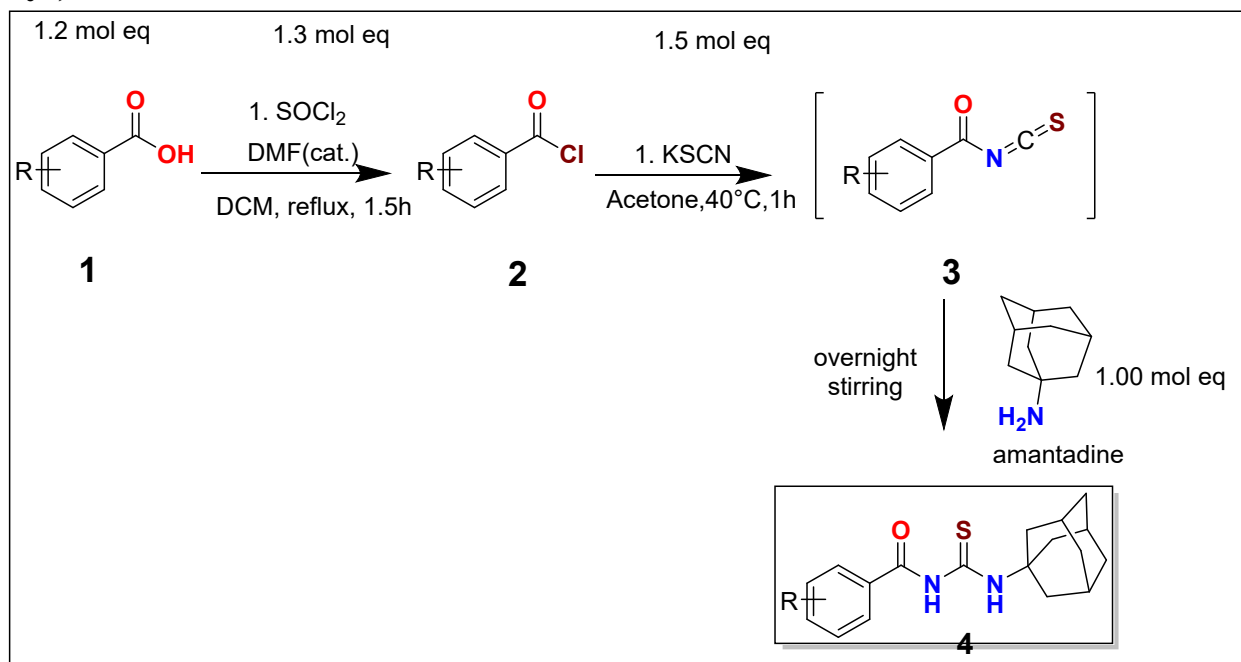

Substituted aryl carboxylic acid (3.97 mmol, 1.2 mol eq) was reacted with thionyl chloride (4.30mmol, 1.3 mol eq) under inert conditions at reflux. The resulting acid chloride was converted to isothiocyanate by adding potassium thiocyanate (4.96mmol, 1.5 mol eq). Amantadine (3,31mmol, 1 mol eq) was added to reaction mixture and heated to 40°C for 1.5 hours. The reaction mixture was pure in crushed ice the crude product precipitated out and recrystallized in ethanol.

## Synthetic pathway to ethyl (Z)-2-((Z)-3-((3s,5s,7s)-adamantan-1-yl)-2-(benzoylimino)-4-oxothiazolidin-5-ylidene)acetate

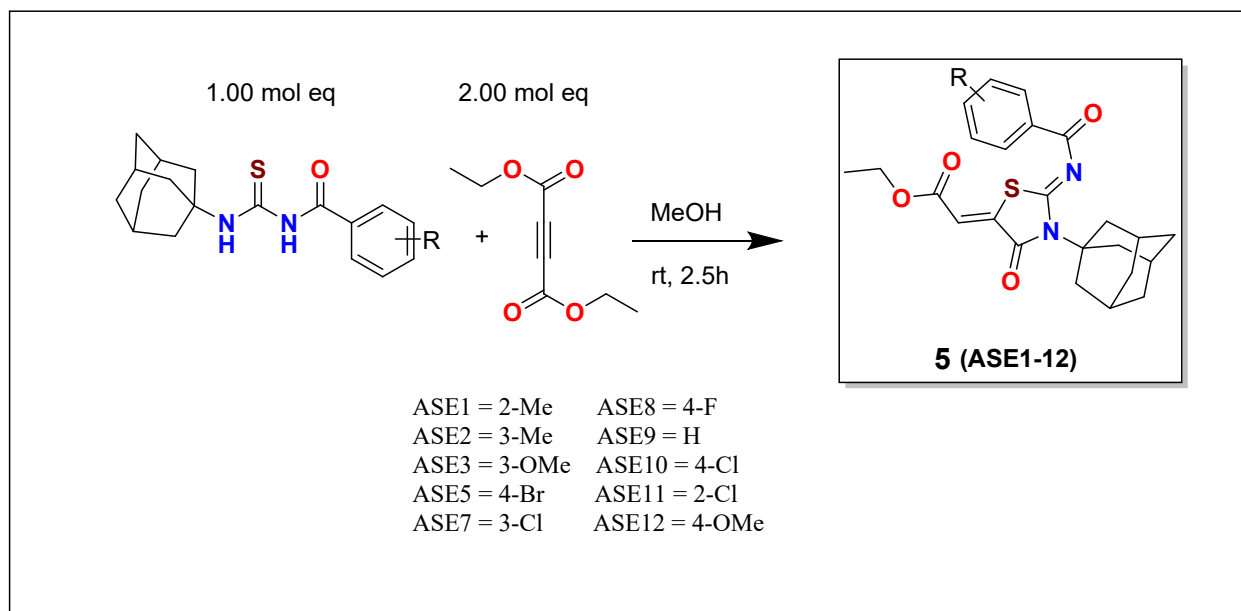

The obtained acyl thioureas in above reaction (1.27mmol, 1 mol eq) were further reacted with ethyl 4-ethoxypent-4-en-2-ynoate (2.54mmol, 2 mol eq) at room temperature. The final product iminothiozolidinone precipitated out during reaction. The product was filtered, recrystallized in ethanol, and dried<sup>1</sup>.





**<sup>13</sup>C-NMR of Ethyl (Z)-2-((Z)-3-((3s,5s,7s)-adamantan-1-yl)-2-((2-methylbenzoyl)imino)-4-oxothiazolidin-5-ylidene)acetate (ASE1)**

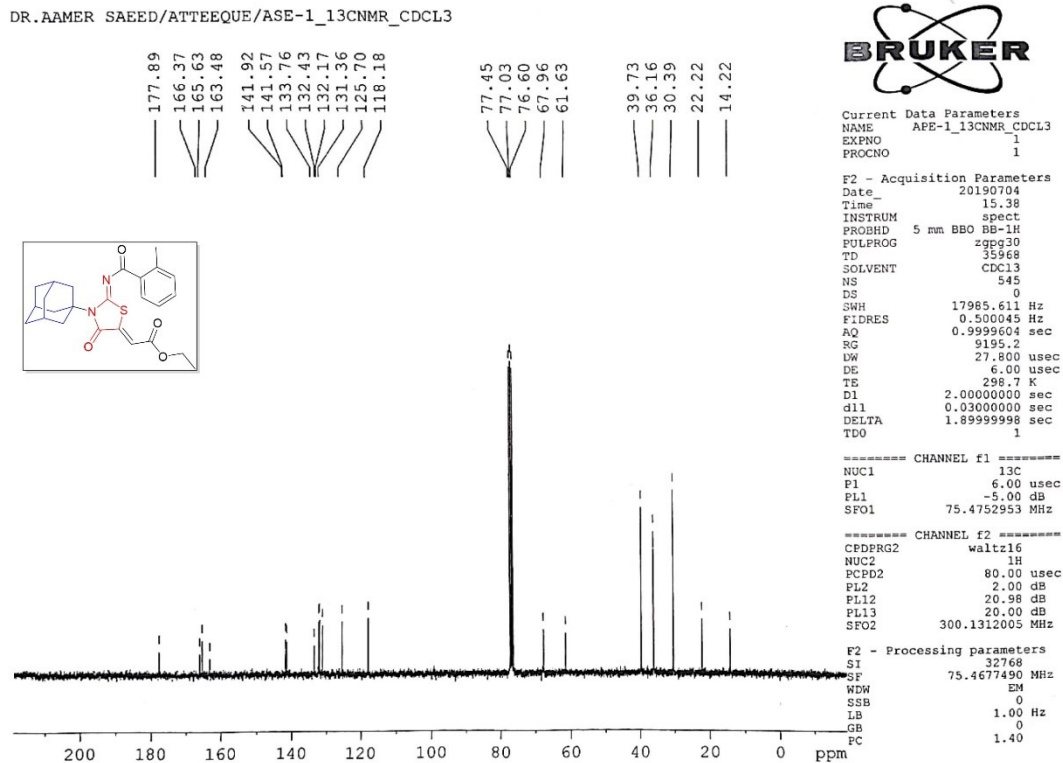

**Figure.** <sup>13</sup>C-NMR (75 MHz, CDCl<sub>3</sub>) spectrum of compound ASE-1.

**FTIR of ethyl (Z)-2-((Z)-3-((3s,5s,7s)-adamantan-1-yl)-2-((2-methylbenzoyl)imino)-4-oxothiazolidin-5-ylidene)acetate (ASE-1)**

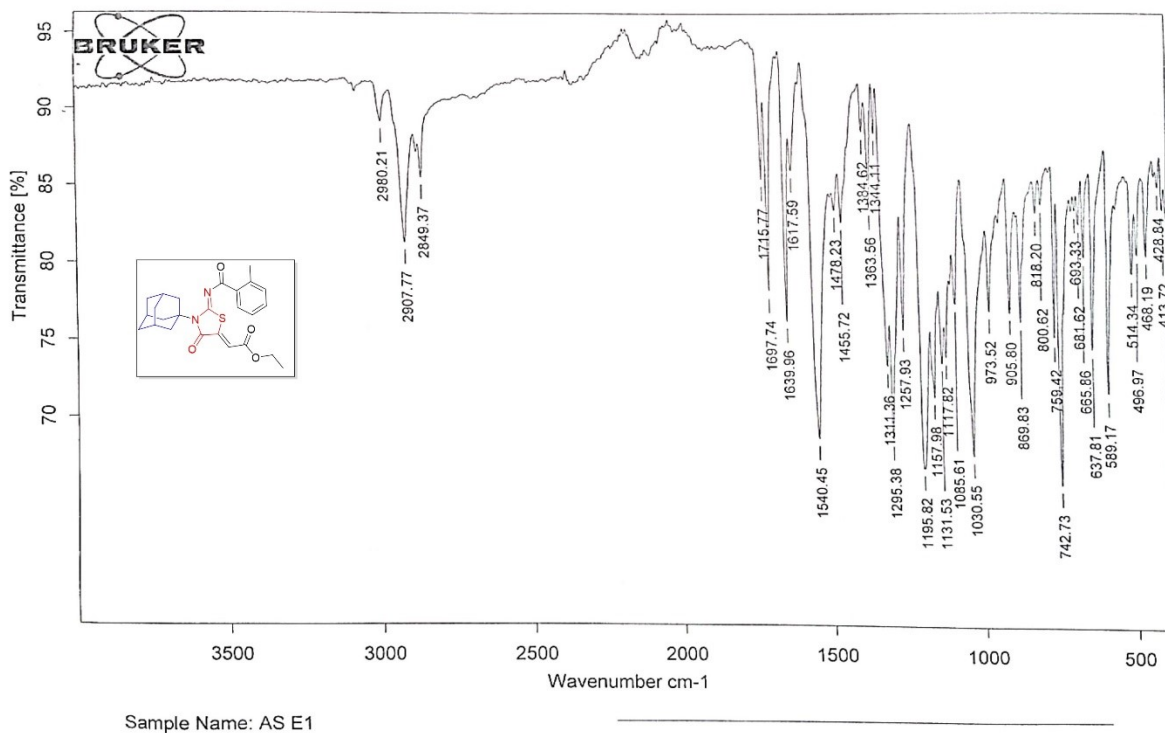

**Figure.** FTIR spectrum of compound ASE-1.

**FTIR of ethyl (Z)-2-((Z)-3-((3s,5s,7s)-adamantan-1-yl)-2-((3-methylbenzoyl)imino)-4-oxothiazolidin-5-ylidene)acetate (ASE-2)**

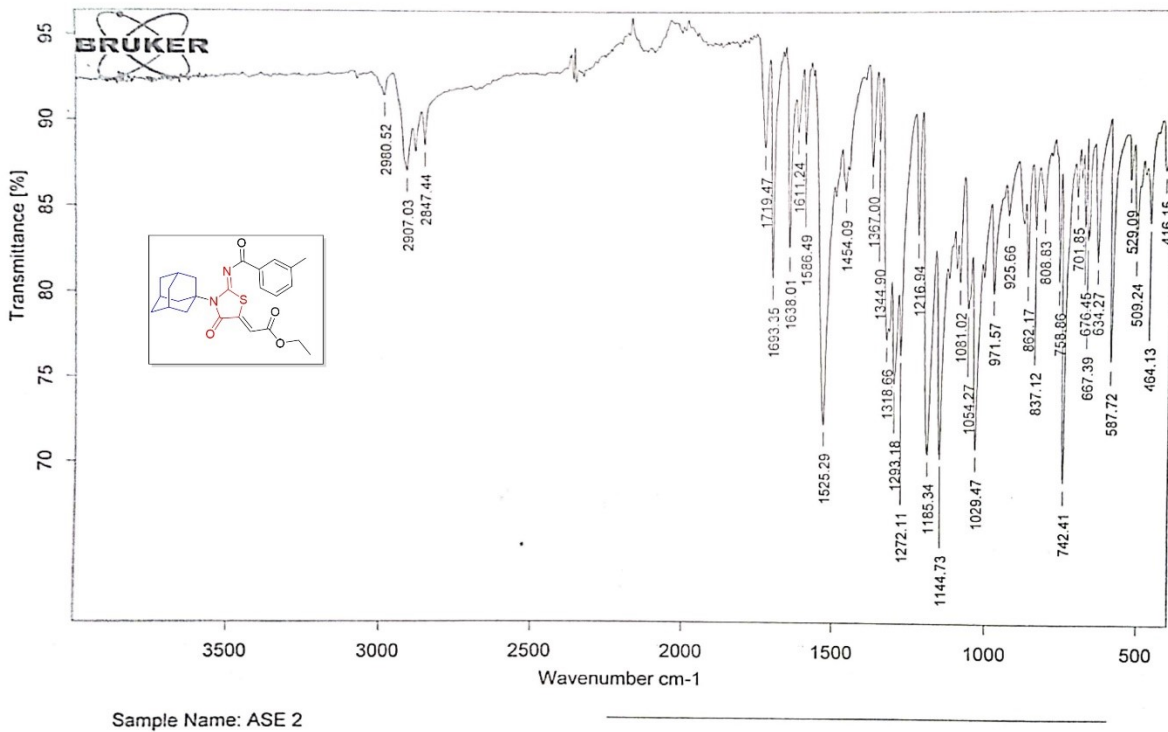

**Figure. FTIR spectrum of compound ASE-2.**

**<sup>1</sup>H-NMR of ethyl (Z)-2-((Z)-3-((3s,5s,7s)-adamantan-1-yl)-2-((3-methoxybenzoyl)imino)-4-oxothiazolidin-5-ylidene)acetate (ASE-3)**

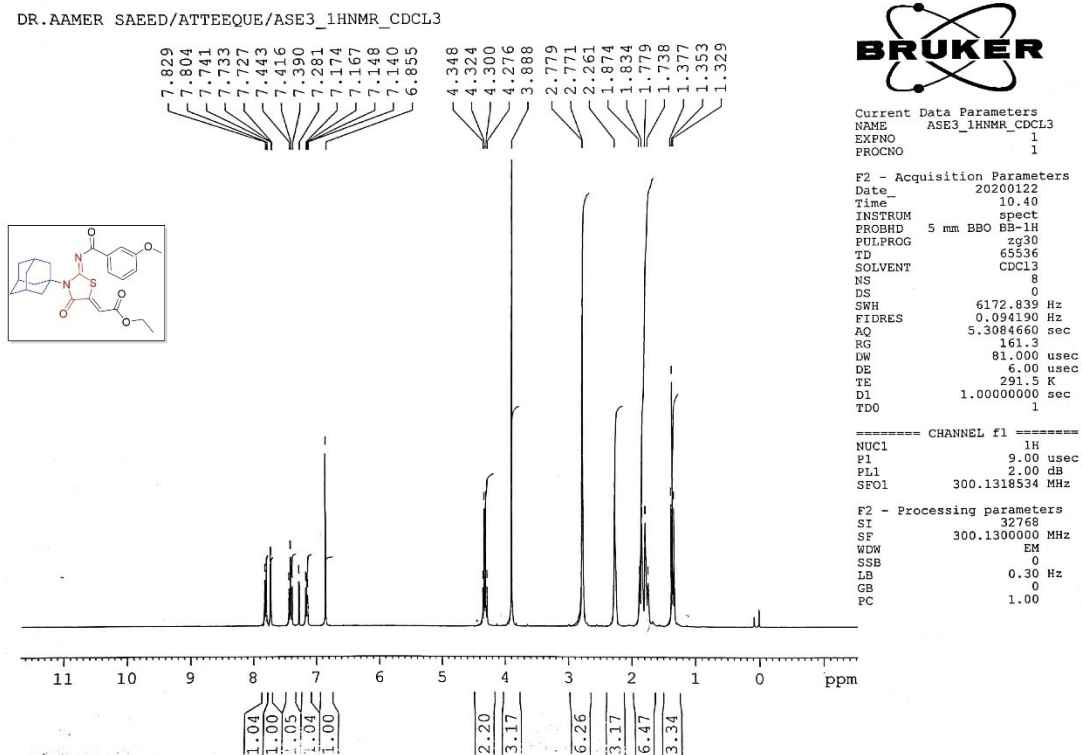

**Figure.** <sup>1</sup>H-NMR (300 MHz, CDCl<sub>3</sub>) spectrum of compound ASE-3.

**<sup>13</sup>C-NMR of ethyl (Z)-2-((Z)-3-((3s,5s,7s)-adamantan-1-yl)-2-((3-methoxybenzoyl)imino)-4-oxothiazolidin-5-ylidene)acetate (ASE-3)**

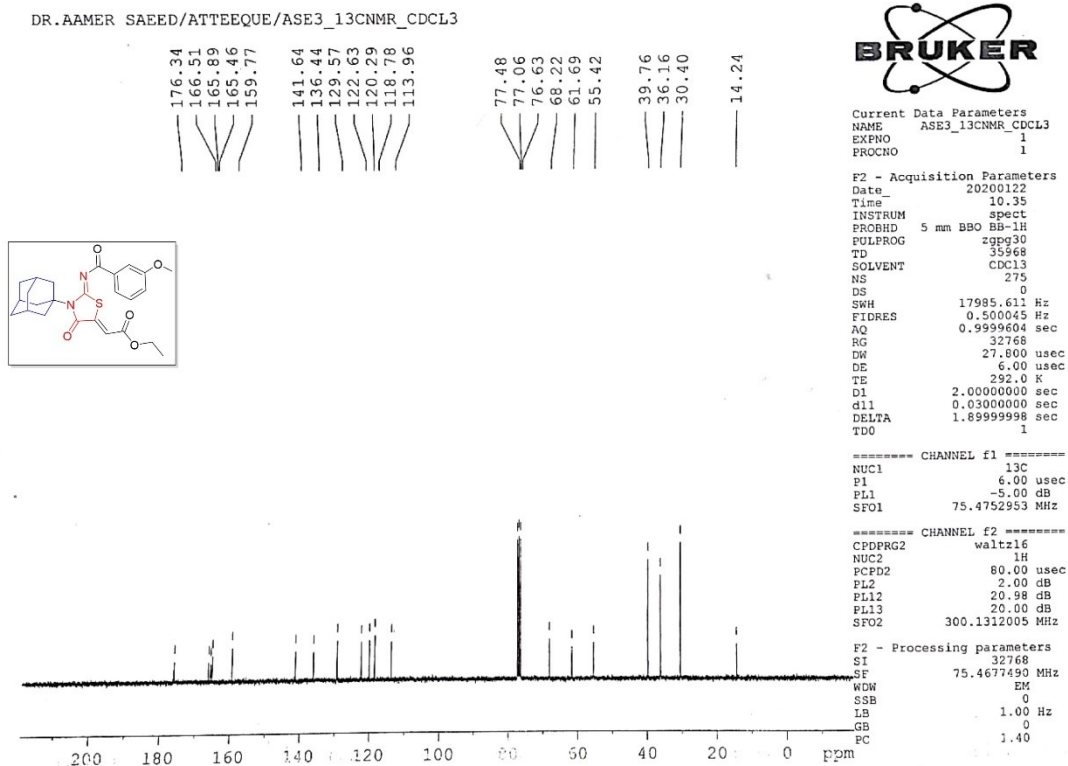

**Figure.** <sup>13</sup>C-NMR (75 MHz, CDCl<sub>3</sub>) spectrum of compound ASE-3.

**FTIR of ethyl (Z)-2-((Z)-3-((3s,5s,7s)-adamantan-1-yl)-2-((3-methoxybenzoyl)imino)-4-oxothiazolidin-5-ylidene)acetate (ASE-3)**

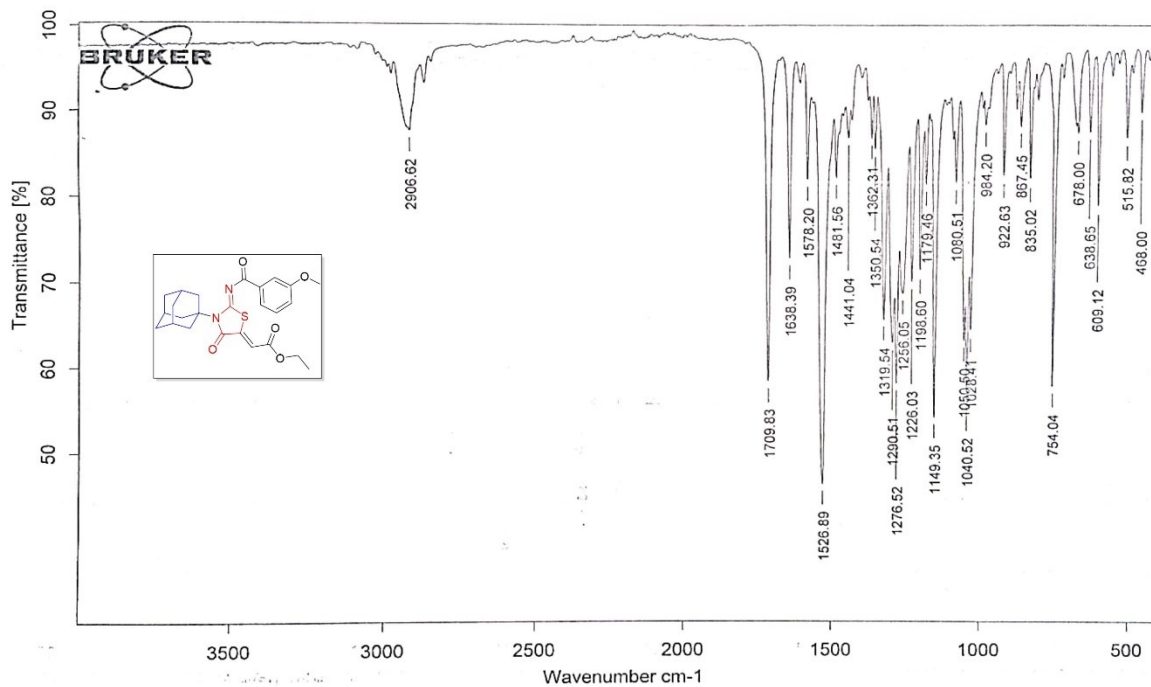

Sample Name: ASE3

**Figure.** FTIR spectrum of compound ASE-3.

**<sup>1</sup>H-NMR of ethyl (Z)-2-((Z)-3-((3s,5s,7s)-adamantan-1-yl)-2-((4-bromobenzoyl)imino)-4-oxothiazolidin-5-ylidene)acetate (ASE-5)**

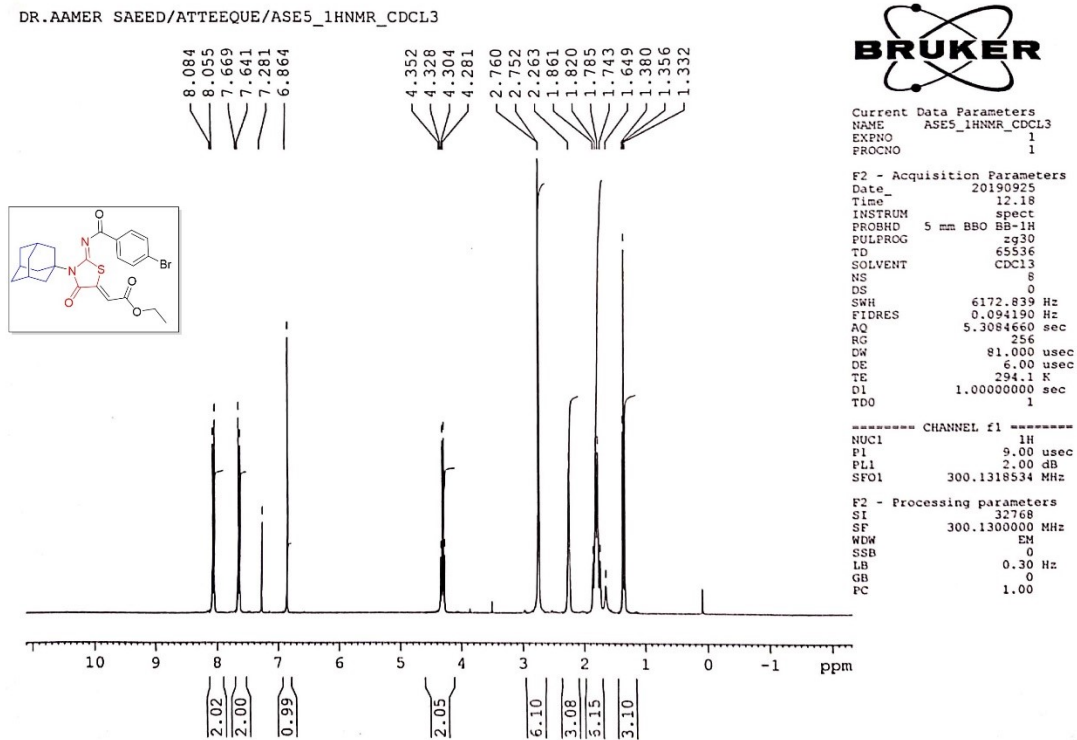

**Figure.** <sup>1</sup>H-NMR (300 MHz, CDCl<sub>3</sub>) spectrum of compound ASE-5.

**<sup>13</sup>C-NMR of ethyl (Z)-2-((Z)-3-((3s,5s,7s)-adamantan-1-yl)-2-((4-bromobenzoyl)imino)-4-oxothiazolidin-5-ylidene)acetate (ASE-5)**

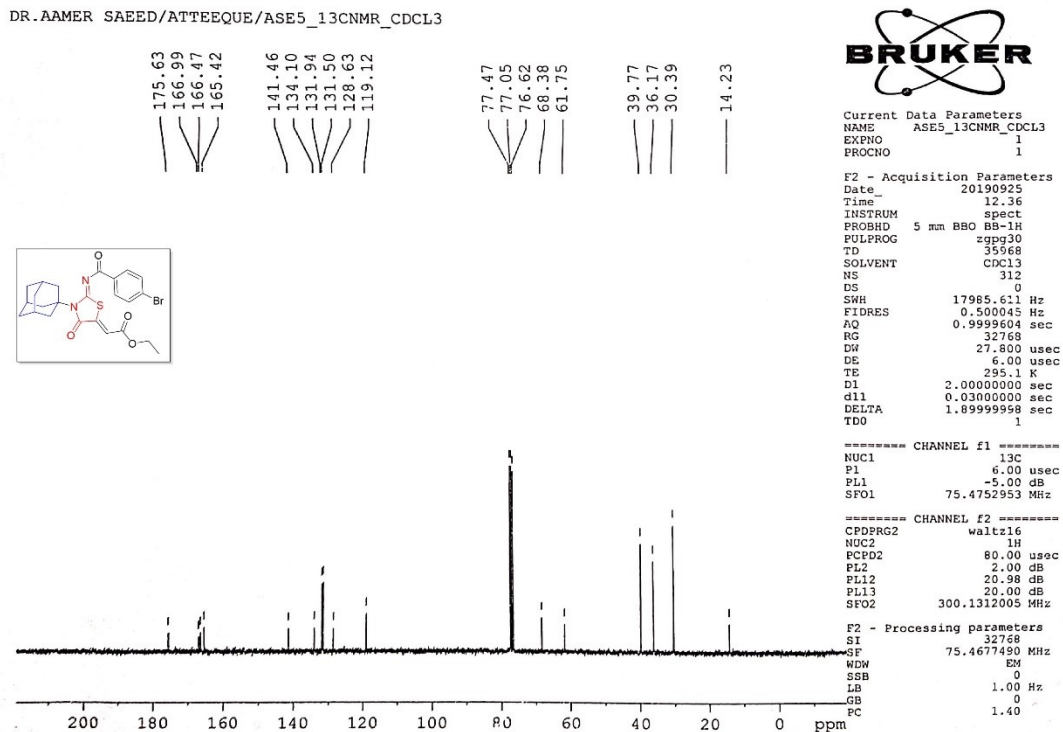

**Figure.** <sup>13</sup>C-NMR (75 MHz, CDCl<sub>3</sub>) spectrum of compound ASE-5.



**FTIR of ethyl (Z)-2-((Z)-3-((3s,5s,7s)-adamantan-1-yl)-2-((4-bromobenzoyl)imino)-4-oxothiazolidin-5-ylidene)acetate (ASE-5)**

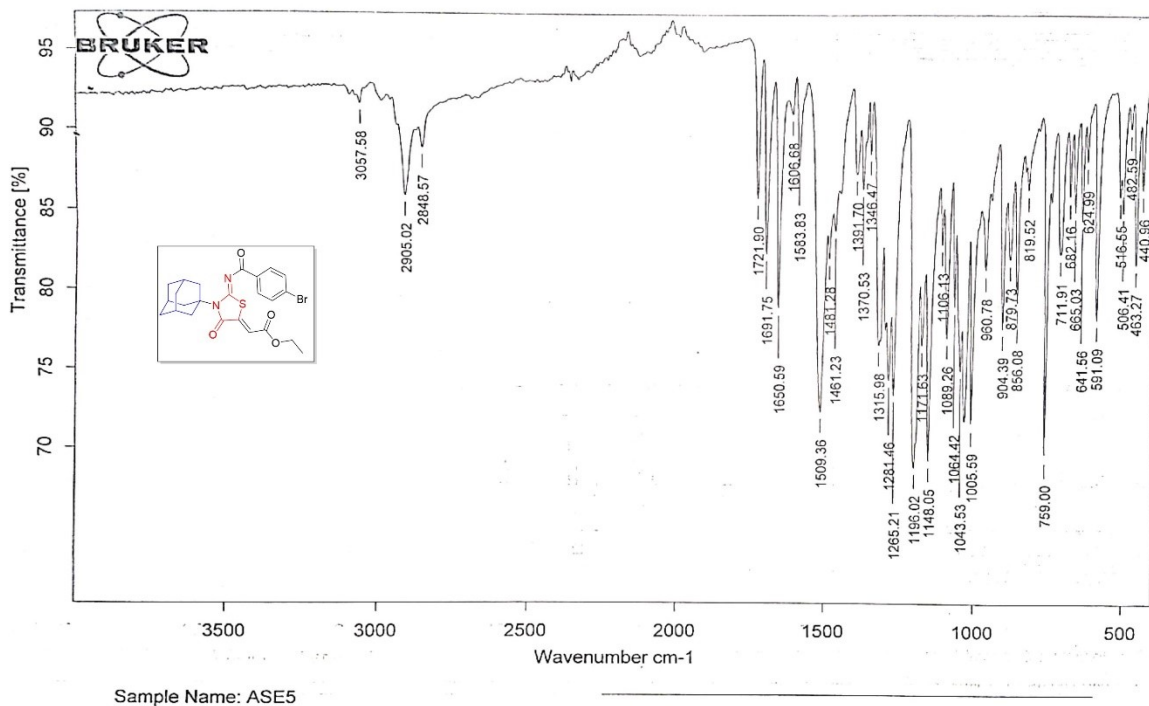

**Figure.** FTIR spectrum of compound ASE-5.

**<sup>1</sup>H-NMR of ethyl (Z)-2-((Z)-3-((3s,5s,7s)-adamantan-1-yl)-2-((3-chlorobenzoyl)imino)-4-oxothiazolidin-5-ylidene)acetate (ASE-7)**

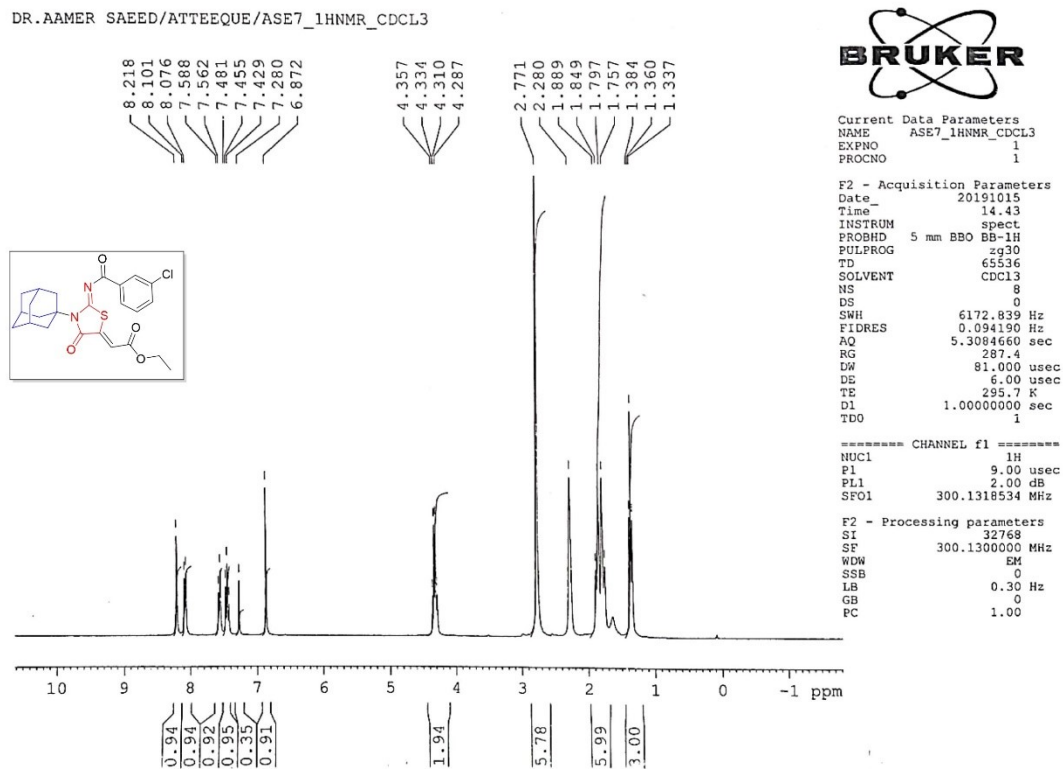

**Figure.** <sup>1</sup>H-NMR (300 MHz, CDCl<sub>3</sub>) spectrum of compound ASE-7.

**<sup>13</sup>C-NMR of ethyl (Z)-2-((Z)-3-((3s,5s,7s)-adamantan-1-yl)-2-((3-chlorobenzoyl)imino)-4-oxothiazolidin-5-ylidene)acetate (ASE-7)**

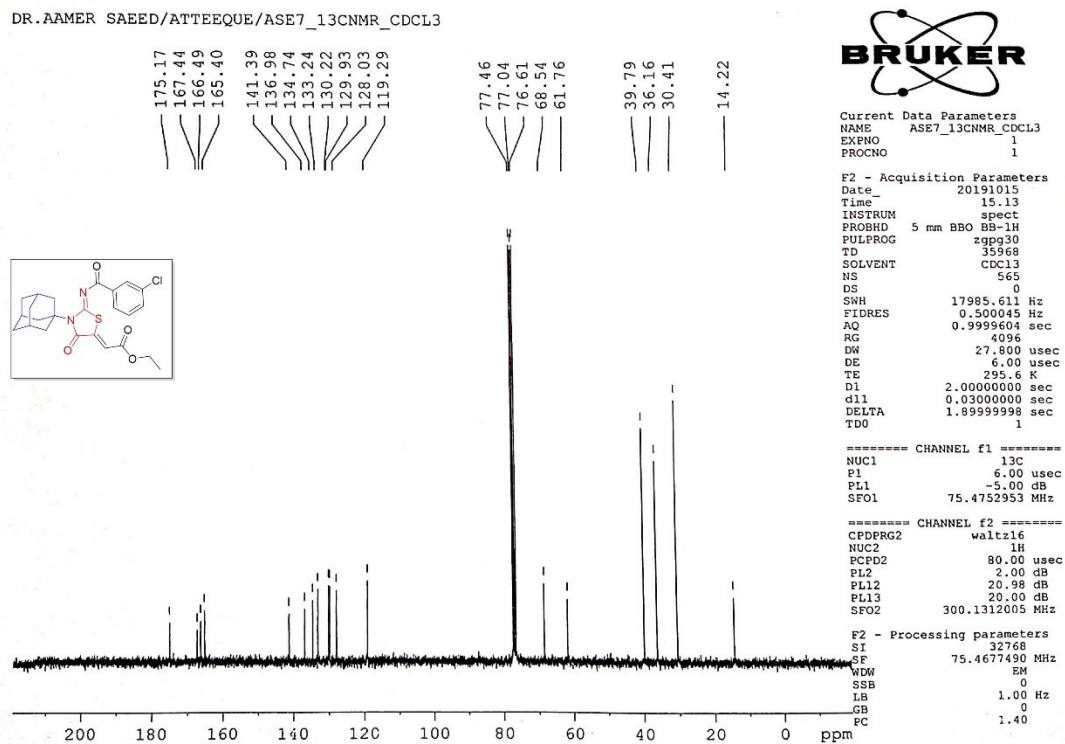

**Figure.** <sup>13</sup>C-NMR (75 MHz, CDCl<sub>3</sub>) spectrum of compound ASE-7.

**FTIR of ethyl (Z)-2-((Z)-3-((3s,5s,7s)-adamantan-1-yl)-2-((3-chlorobenzoyl)imino)-4-oxothiazolidin-5-ylidene)acetate (ASE-7)**

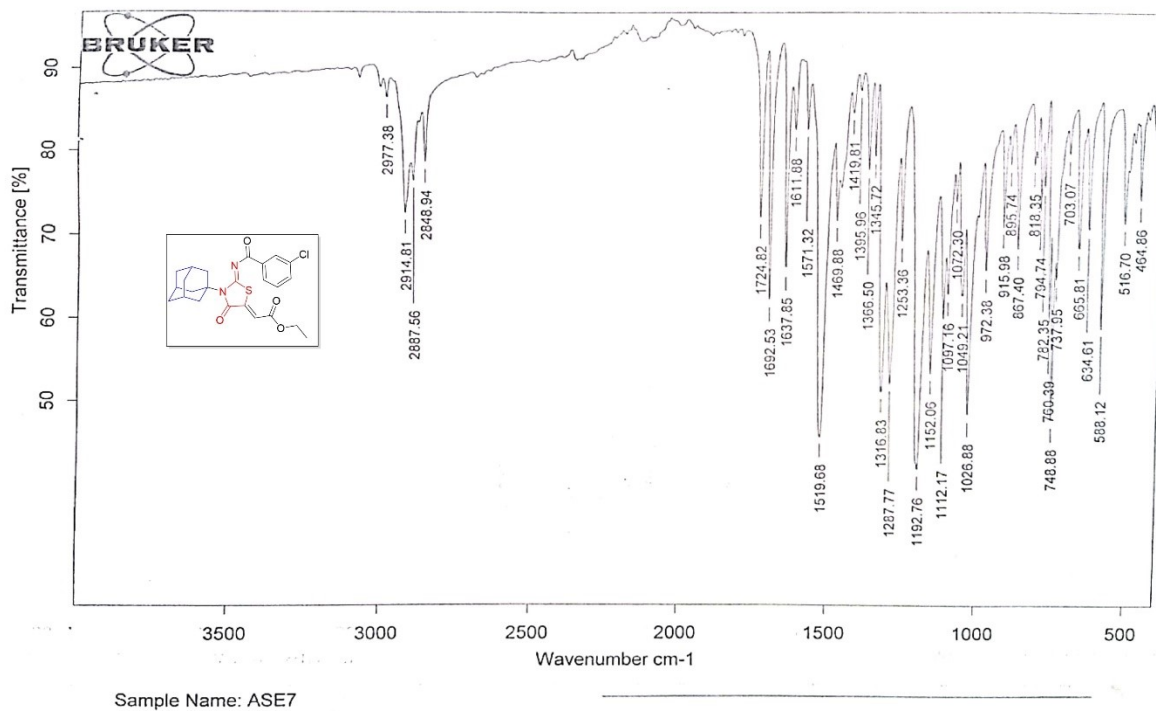

**Figure.** FTIR spectrum of compound ASE-7.

**<sup>1</sup>H-NMR of ethyl (Z)-2-((Z)-3-((3s,5s,7s)-adamantan-1-yl)-2-((4-fluorobenzoyl)imino)-4-oxothiazolidin-5-ylidene)acetate (ASE-8)**

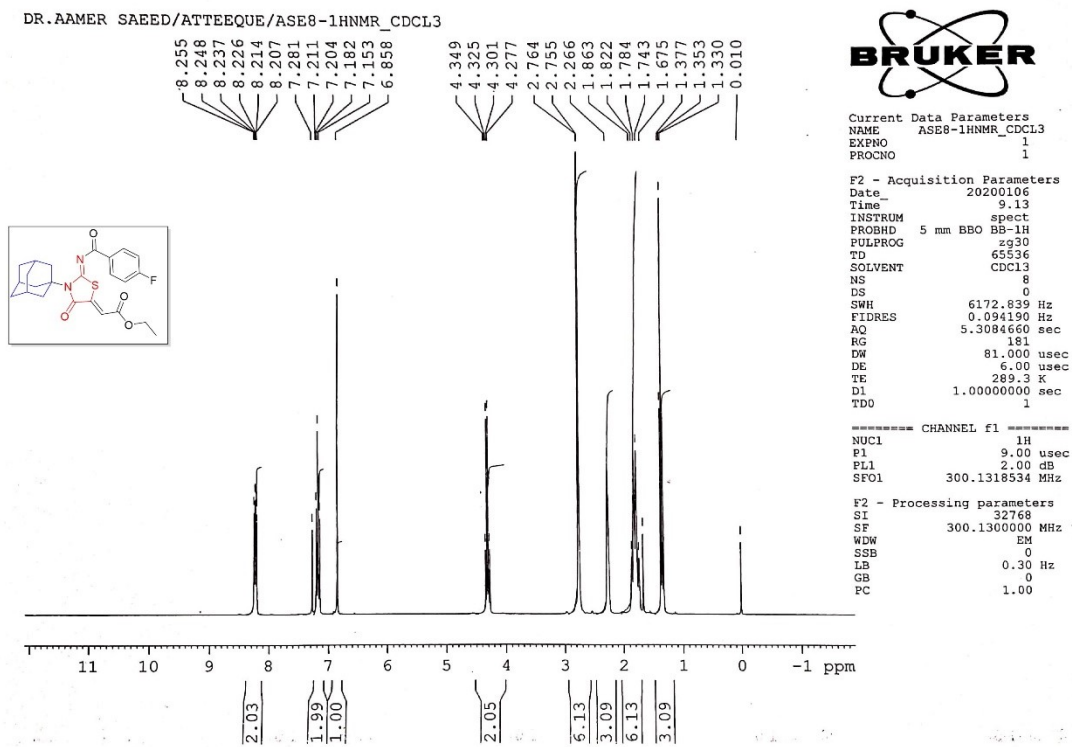

**Figure.** <sup>1</sup>H-NMR (300 MHz, CDCl<sub>3</sub>) spectrum of compound ASE-8.

**<sup>13</sup>C-NMR of ethyl (Z)-2-((Z)-3-((3s,5s,7s)-adamantan-1-yl)-2-((4-fluorobenzoyl)imino)-4-oxothiazolidin-5-ylidene)acetate (ASE-8)**

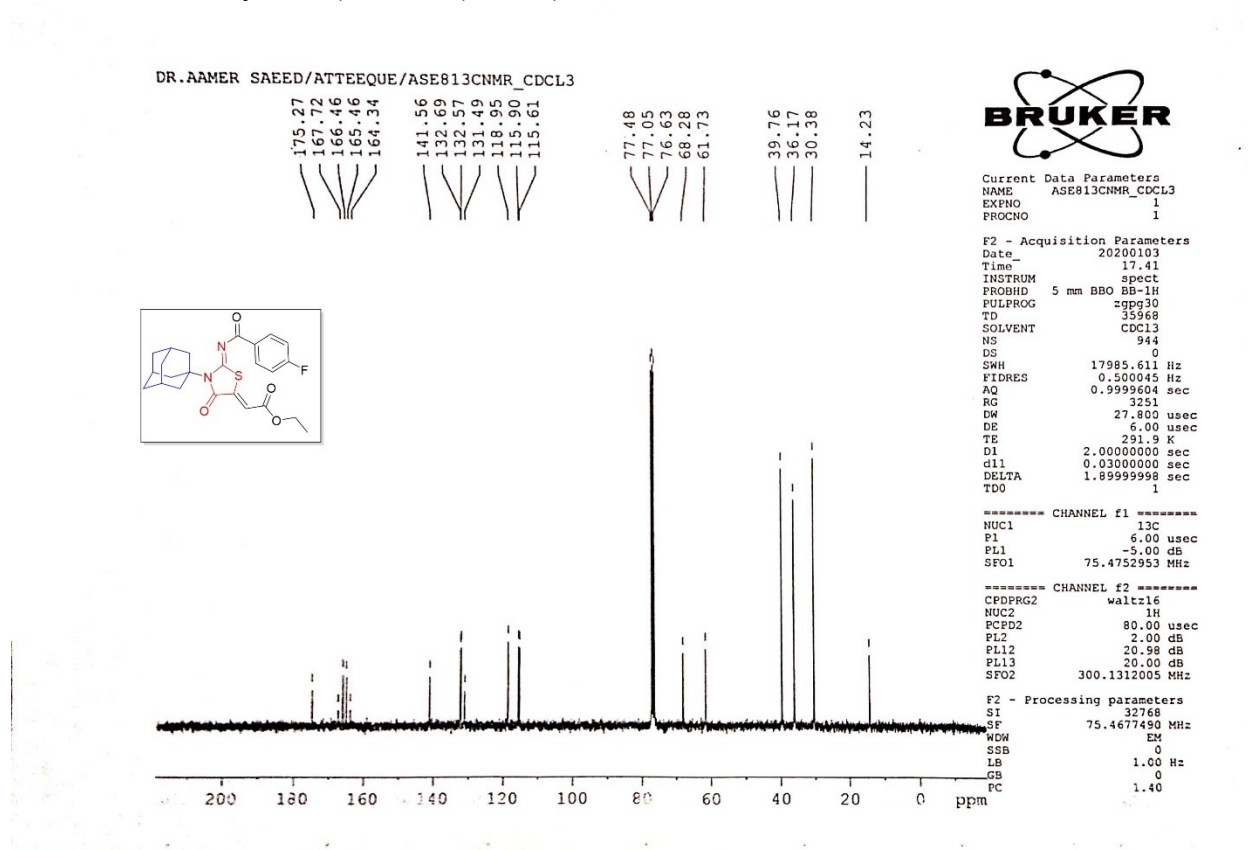

**Figure.** <sup>13</sup>C-NMR (75 MHz, CDCl<sub>3</sub>) spectrum of compound ASE-8.

**FTIR of ethyl (Z)-2-((Z)-3-((3s,5s,7s)-adamantan-1-yl)-2-((4-fluorobenzoyl)imino)-4-oxothiazolidin-5-ylidene)acetate (ASE-8)**

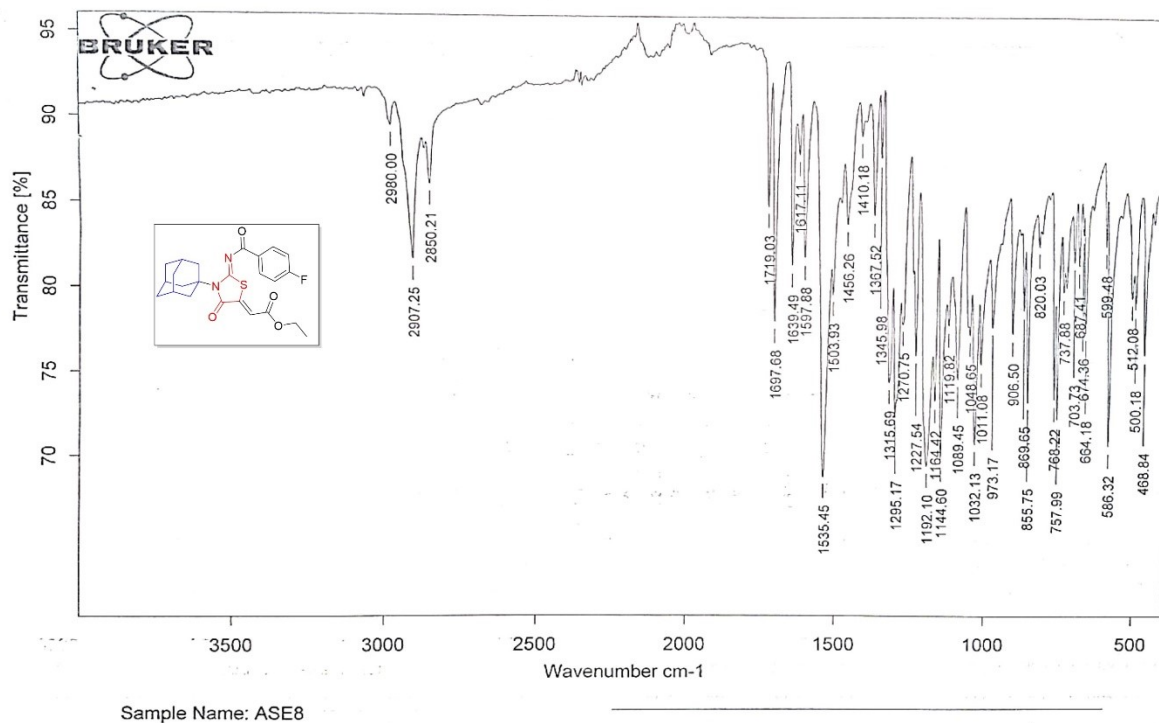

**Figure.** FTIR spectrum of compound ASE-8.

**<sup>1</sup>H-NMR of ethyl (Z)-2-((Z)-3-((3s,5s,7s)-adamantan-1-yl)-2-(benzoylimino)-4-oxothiazolidin-5-ylidene)acetate (ASE-9)**

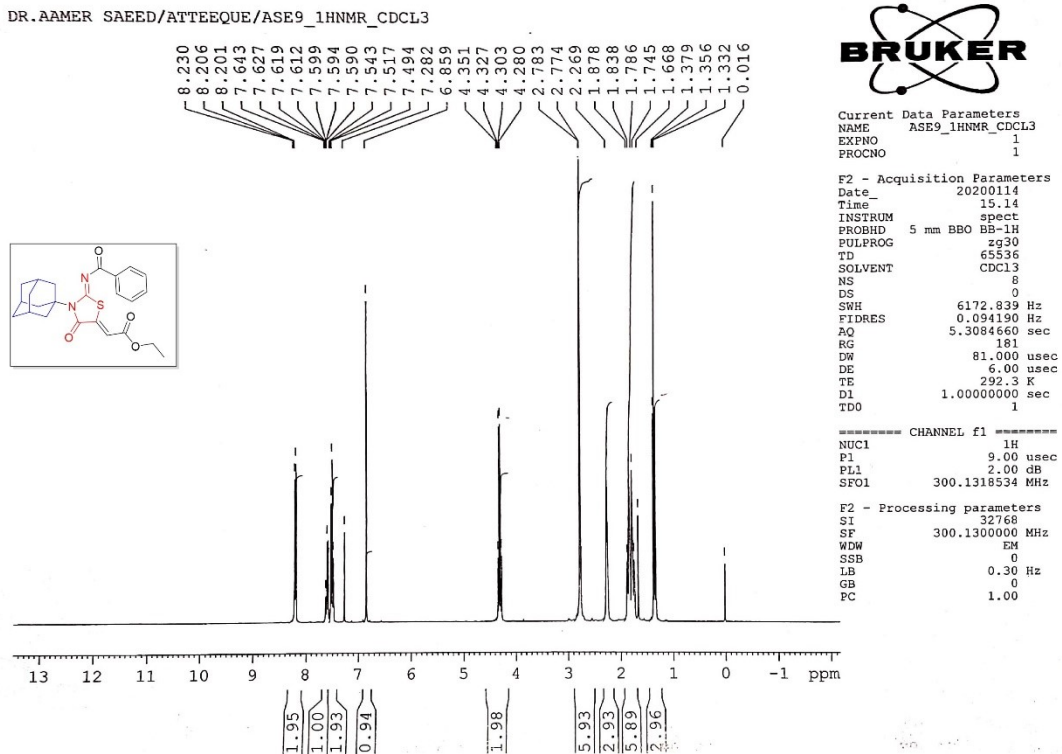

**Figure.** <sup>1</sup>H-NMR (300 MHz, CDCl<sub>3</sub>) spectrum of compound ASE-9.



**<sup>13</sup>C-NMR of ethyl (Z)-2-((Z)-3-((3s,5s,7s)-adamantan-1-yl)-2-(benzoylimino)-4-oxothiazolidin-5-ylidene)acetate (ASE-9)**

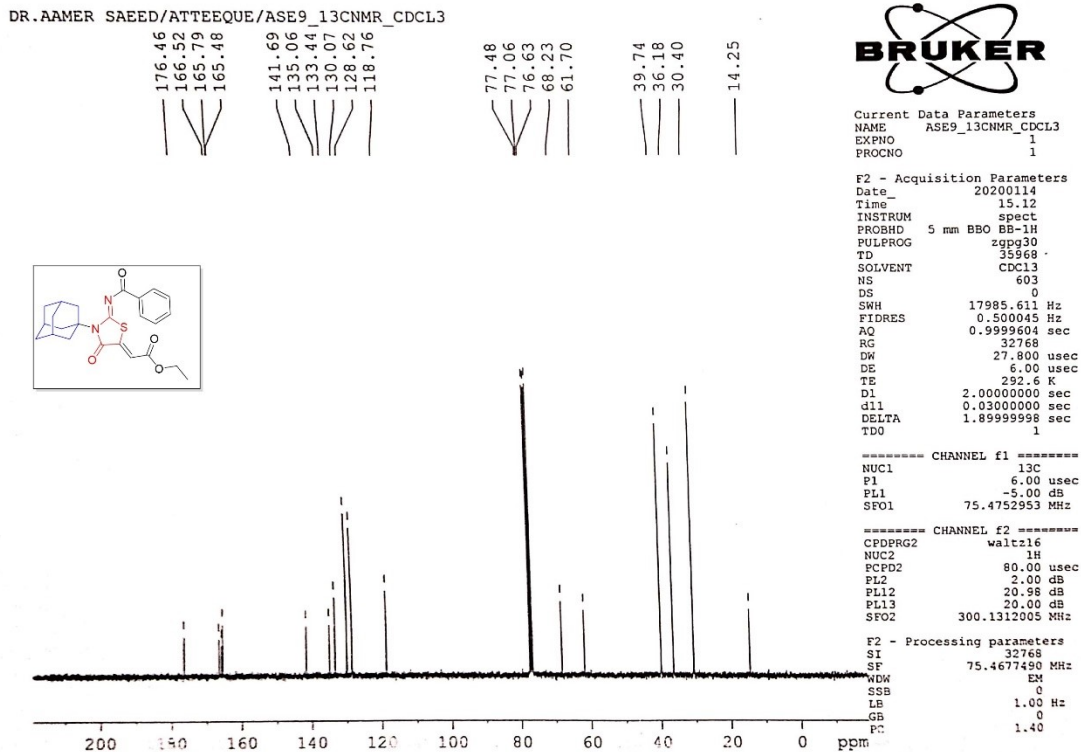

**Figure.** <sup>13</sup>C-NMR (75 MHz, CDCl<sub>3</sub>) spectrum of compound ASE-9.

**FTIR of ethyl (Z)-2-((Z)-3-((3s,5s,7s)-adamantan-1-yl)-2-(benzoylimino)-4-oxothiazolidin-5-ylidene)acetate (ASE-9)**

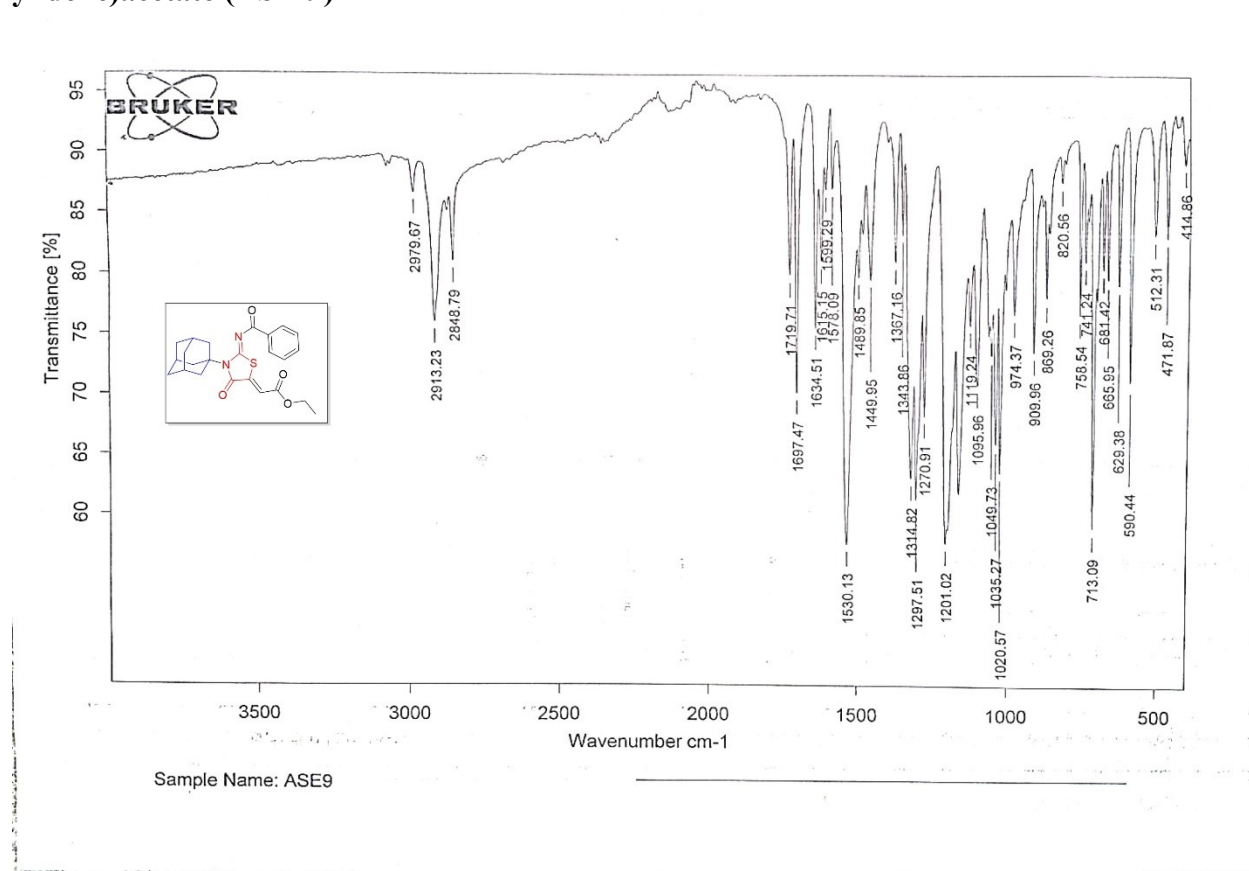

**Figure.** FTIR spectrum of compound ASE-9.

**<sup>1</sup>H-NMR of ethyl (Z)-2-((Z)-3-((3s,5s,7s)-adamantan-1-yl)-2-((4-chlorobenzoyl)imino)-4-oxothiazolidin-5-ylidene)acetate (ASE-10)**

DR.AAMER SAEED/ATTEEQUE/ASE-10\_1HNMR\_CDCL3

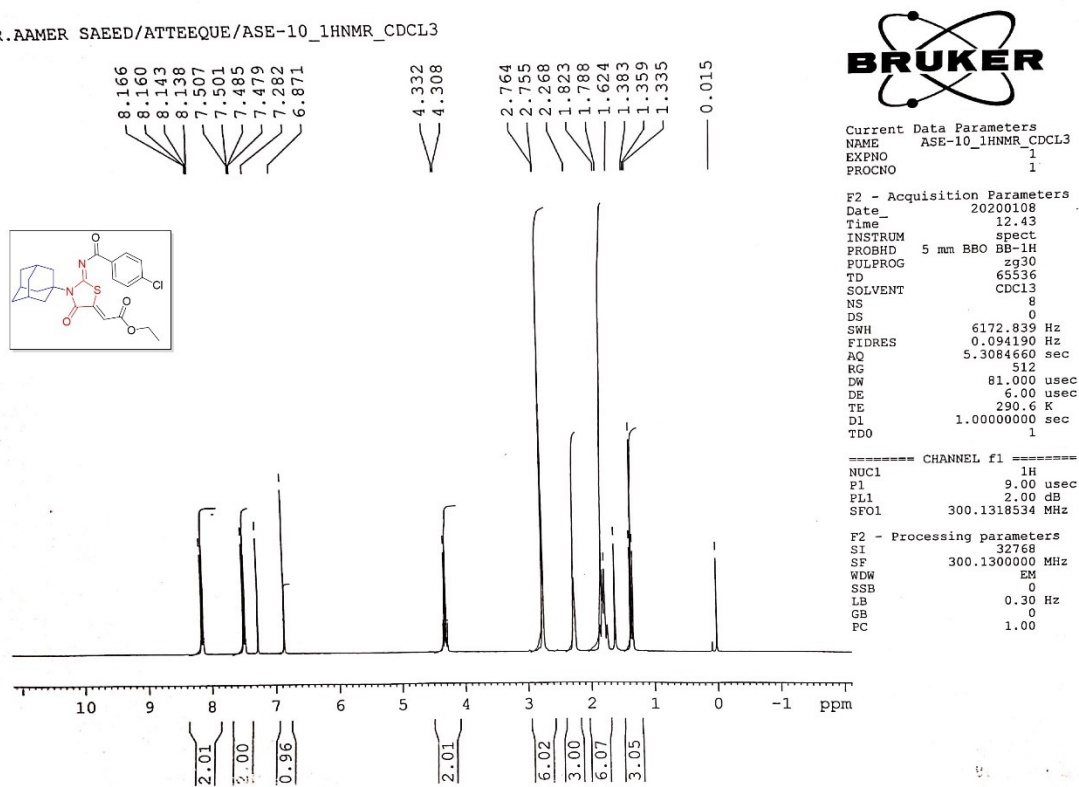

**Figure. <sup>1</sup>H-NMR (300 MHz, CDCl<sub>3</sub>) spectrum of compound ASE-10.**

**$^{13}\text{C}$ -NMR of ethyl (Z)-2-((Z)-3-((3s,5s,7s)-adamantan-1-yl)-2-((4-chlorobenzoyl)imino)-4-oxothiazolidin-5-ylidene)acetate (ASE-10)**

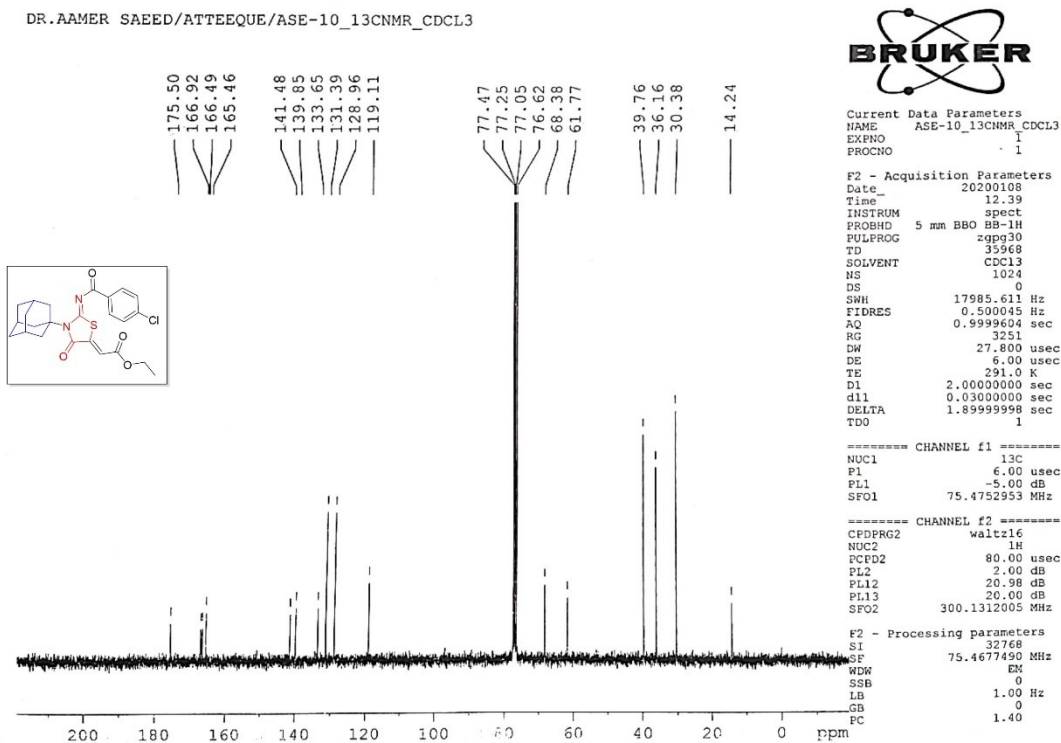

**Figure.**  $^{13}\text{C}$ -NMR (75 MHz,  $\text{CDCl}_3$ ) spectrum of compound ASE-10.

**FTIR of ethyl (Z)-2-((Z)-3-((3s,5s,7s)-adamantan-1-yl)-2-((4-chlorobenzoyl)imino)-4-oxothiazolidin-5-ylidene)acetate (ASE-10)**

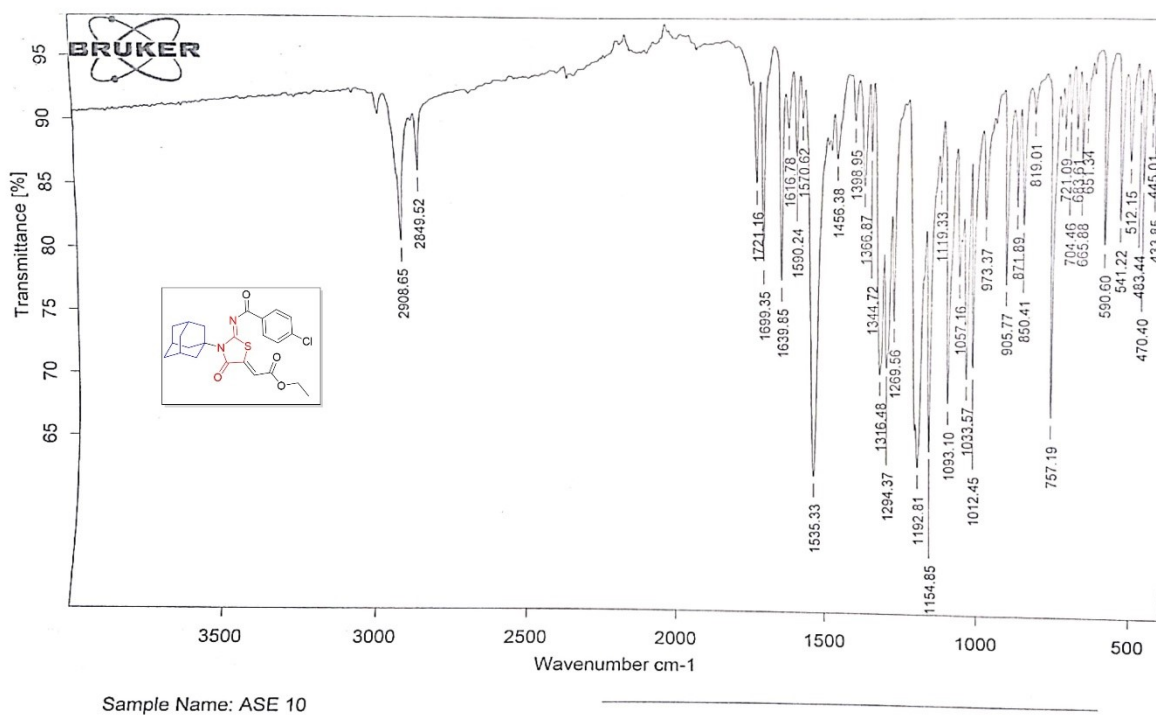

**Figure.** FTIR spectrum of compound ASE-10.

**<sup>1</sup>H-NMR of ethyl (Z)-2-((Z)-3-((3s,5s,7s)-adamantan-1-yl)-2-((2-chlorobenzoyl)imino)-4-oxothiazolidin-5-ylidene)acetate (ASE-11)**

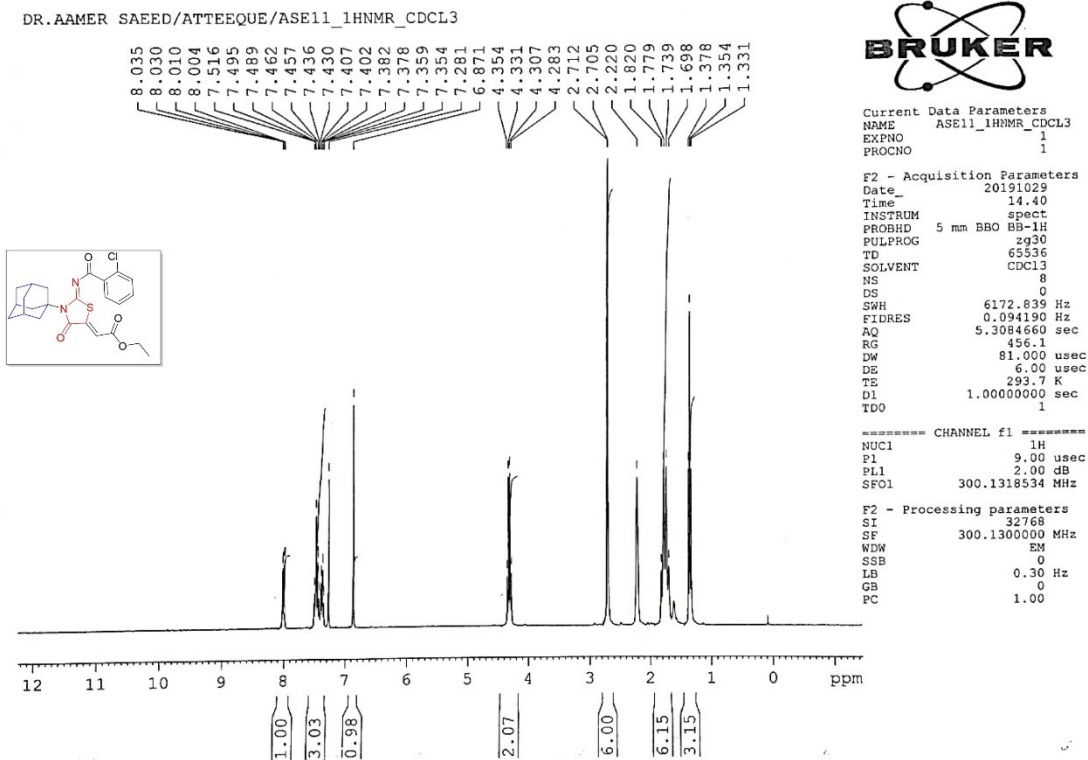

**Figure. <sup>1</sup>H-NMR (300 MHz, CDCl<sub>3</sub>) spectrum of compound ASE-11.**

**<sup>13</sup>C-NMR of ethyl (Z)-2-((Z)-3-((3s,5s,7s)-adamantan-1-yl)-2-((2-chlorobenzoyl)imino)-4-oxothiazolidin-5-ylidene)acetate (ASE-11)**

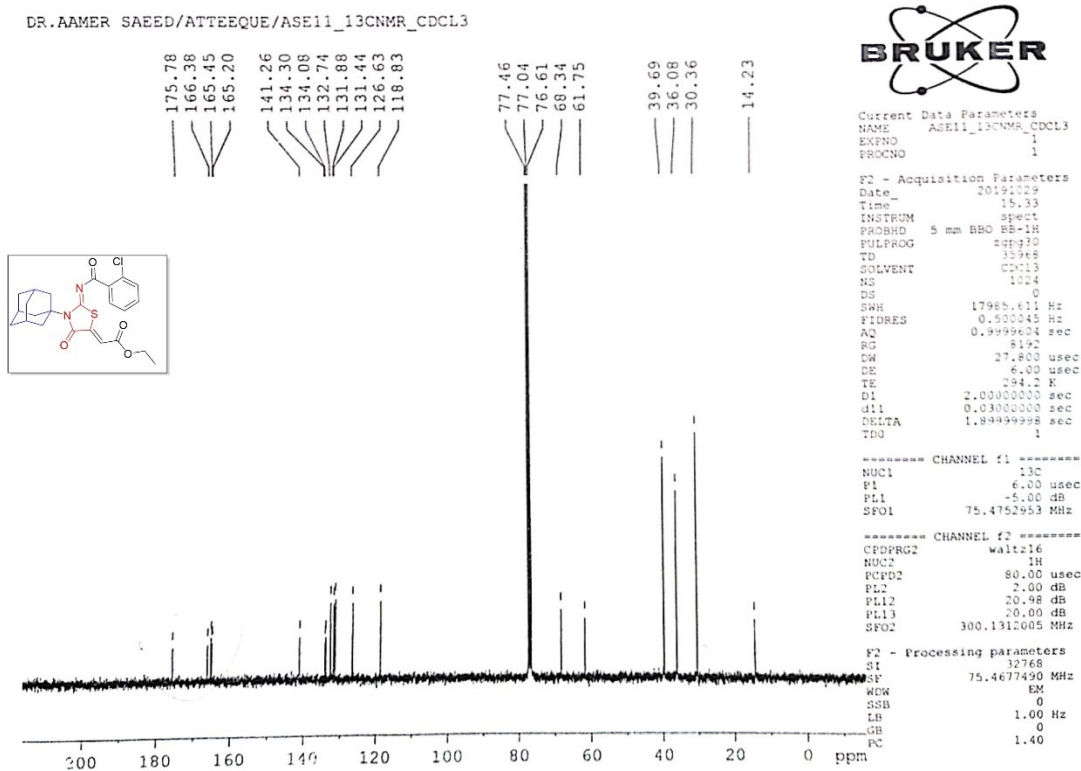

**Figure.** <sup>13</sup>C-NMR (75 MHz, CDCl<sub>3</sub>) spectrum of compound ASE-11.

**FTIR of ethyl (Z)-2-((Z)-3-((3s,5s,7s)-adamantan-1-yl)-2-((2-chlorobenzoyl)imino)-4-oxothiazolidin-5-ylidene)acetate (ASE-11)**

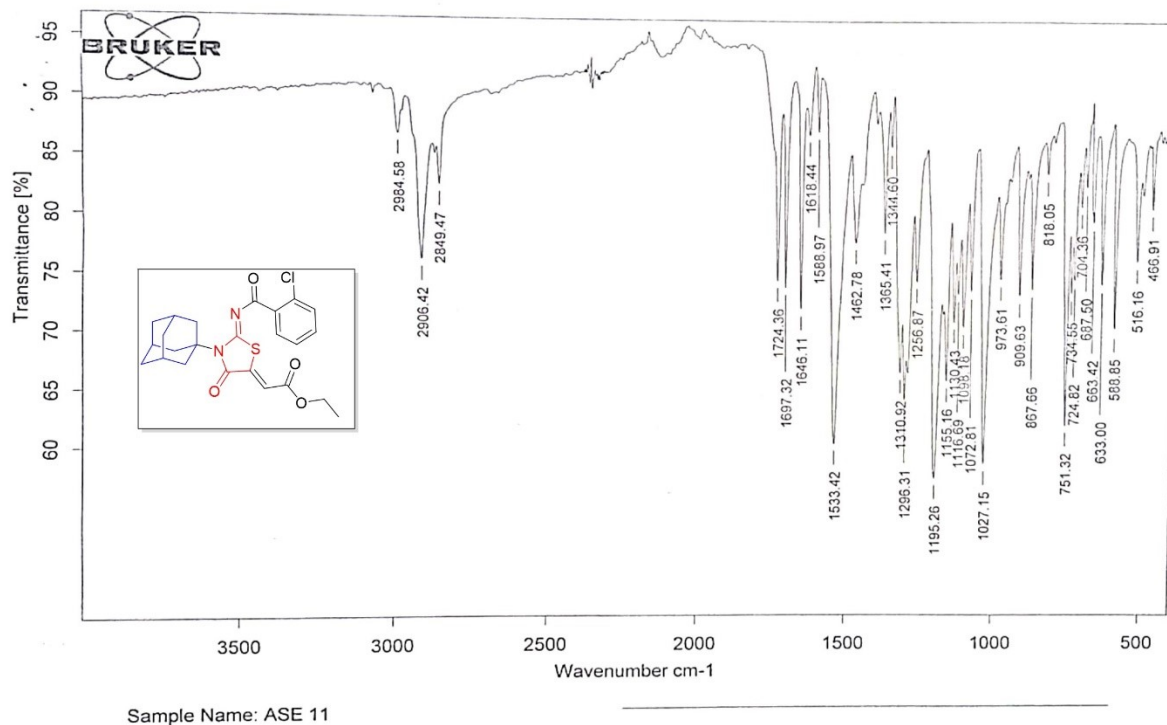

**Figure.** FTIR spectrum of compound ASE-11.



**<sup>1</sup>H-NMR of ethyl (Z)-2-((Z)-3-((3s,5s,7s)-adamantan-1-yl)-2-((4-methoxybenzoyl)imino)-4-oxothiazolidin-5-ylidene)acetate (ASE-12)**

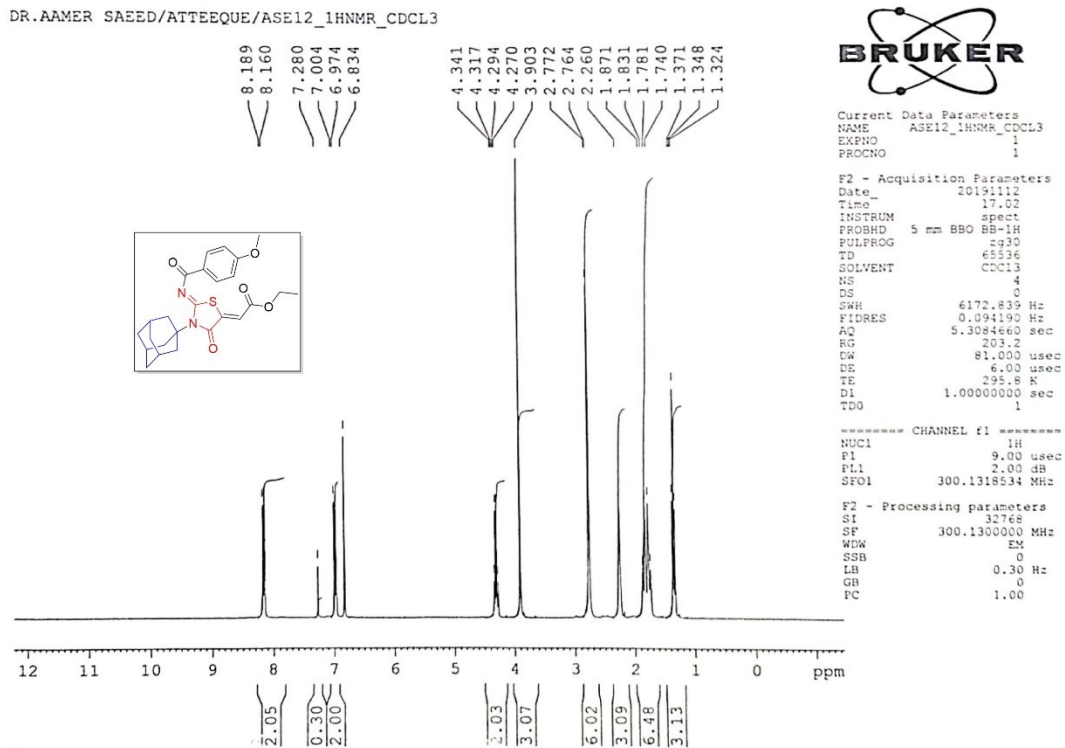

**Figure. <sup>1</sup>H-NMR (300 MHz, CDCl<sub>3</sub>) spectrum of compound ASE-12.**

**<sup>13</sup>C-NMR of ethyl (Z)-2-((Z)-3-((3s,5s,7s)-adamantan-1-yl)-2-((4-methoxybenzoyl)imino)-4-oxothiazolidin-5-ylidene)acetate (ASE-12)**

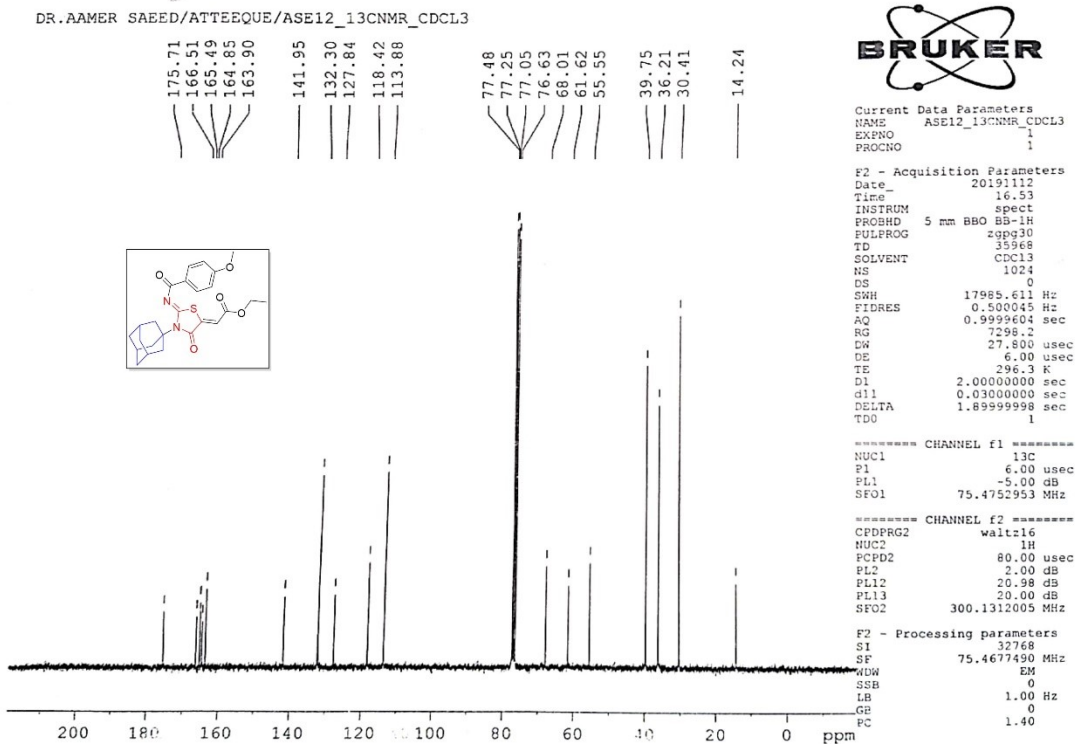

**Figure.** <sup>13</sup>C-NMR (75 MHz, CDCl<sub>3</sub>) spectrum of compound ASE-12.

**FTIR of ethyl (Z)-2-((Z)-3-((3s,5s,7s)-adamantan-1-yl)-2-((4-methoxybenzoyl)imino)-4-oxothiazolidin-5-ylidene)acetate (ASE-12)**

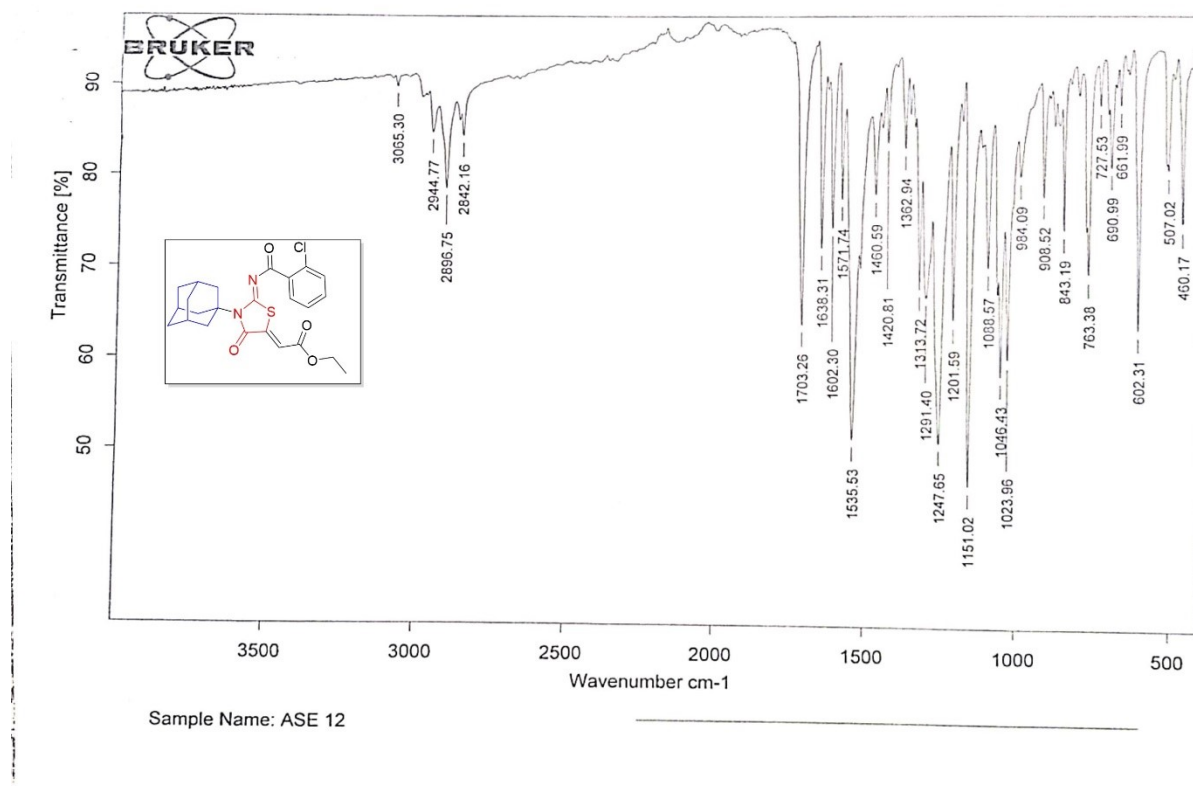

**Figure.** FTIR spectrum of compound ASE-12.

**REFERENCES**

1 Ali, S., Saeed, A., Abbas, N., Shahid, M., Bolte, M. and Iqbal, J., 2012. Design, synthesis and molecular modelling of novel methyl [4-oxo-2-(aroylimino)-3-(substituted phenyl) thiazolidin-5-ylidene] acetates as potent and selective aldose reductase inhibitors. *MedChemComm*, 3(11), pp.1428-1434.
